# Supplementary material for: Self-assembled polypyrrole nanotubes/MoS2 quantum dots for high performance solid state flexible symmetric supercapacitors
Source: Royal Society of Chemistry journal article supplement (doi:10.1039/d1se01391b), 2021-01-01
Supplement: d1se01391b1.pdf [file d1se01391b1.pdf]

## Supporting Information

### Self-Assembled Polypyrrole Nanotubes/MoS<sub>2</sub> Quantum Dots for High Performance Solid State Flexible Symmetric Supercapacitor

Vijeth Hebri<sup>1</sup>, Rabah Boukherroub<sup>2</sup>, Ashokkumar Shankar Pawar<sup>3</sup>, Vandana Molahalli<sup>3</sup>, and  
Devendrappa Hundekal<sup>3\*</sup>

<sup>1</sup>Department of Physics, Mangalore Institute of Technology and Engineering Moodbidri,  
Badaga Mijar -574225, India

<sup>2</sup>Univ. Lille, CNRS, Centrale Lille, Univ. Polytechnique Hauts-de-France, UMR 8520-  
IEMN, Lille F-59000, France

<sup>3</sup>Department of Physics, Mangalore University, Mangalagangothri, Mangalore- 574199, India

\*Corresponding author: dehu2010@gmail.com

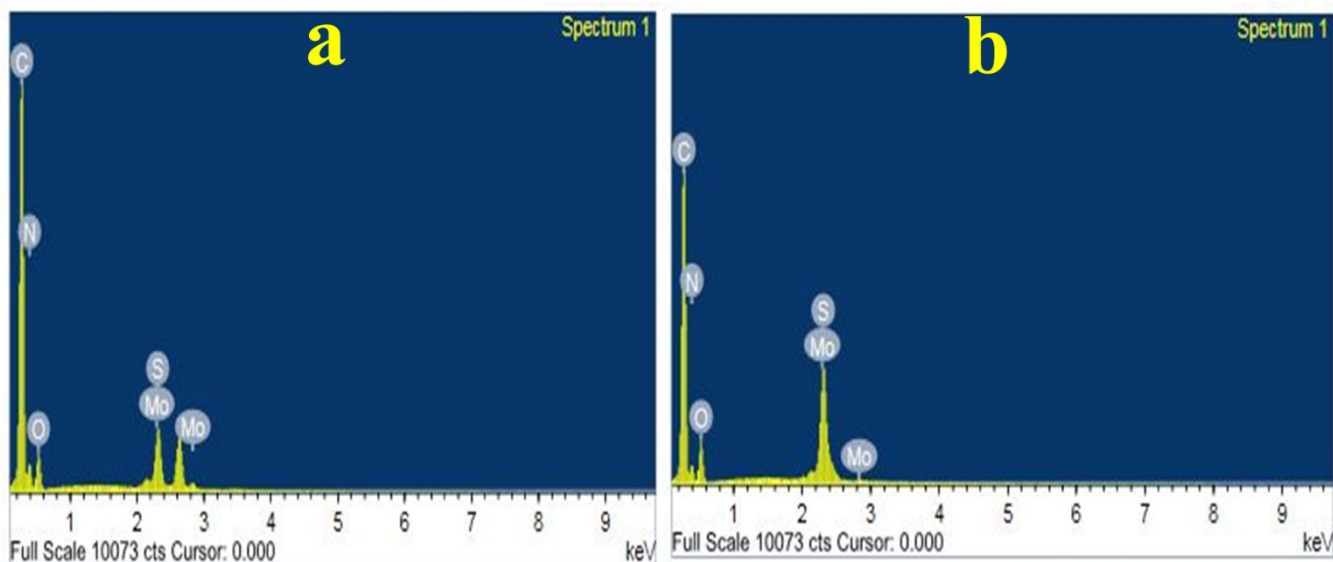

**Figure S1.** The EDAX pattern of (g) PNTs, (h) PNTs/MoS<sub>2</sub> and (i) CS-PNTs/MoS<sub>2</sub> nanocomposites.

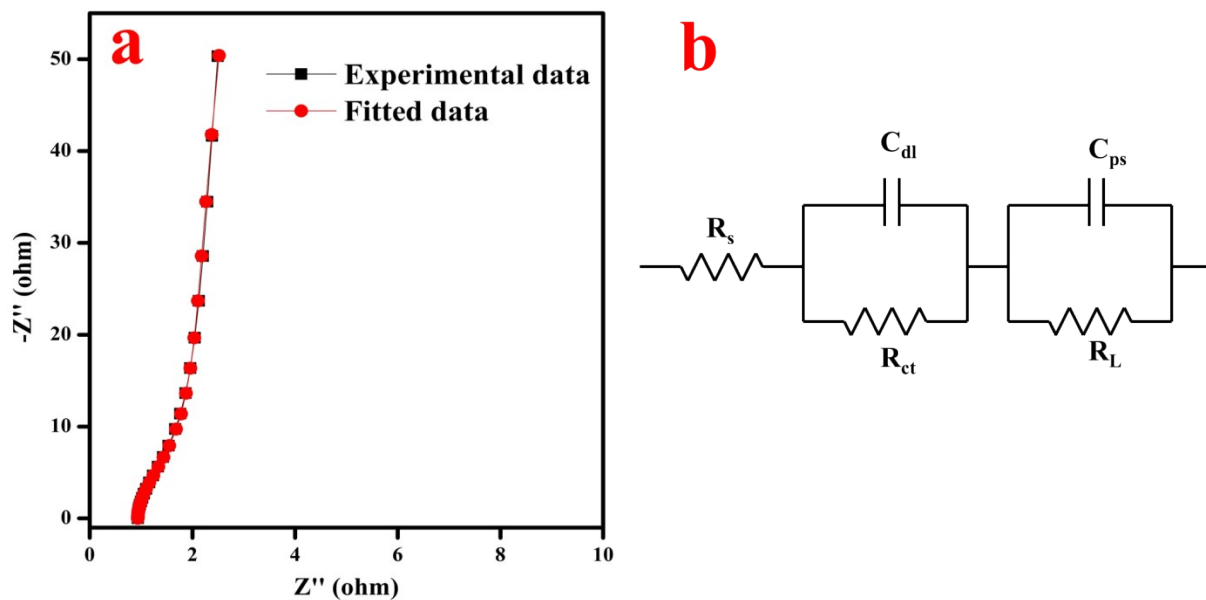

Figure S2. (a) The fitted Nyquist plot with the experimental plot. (b) Equivalent circuit.

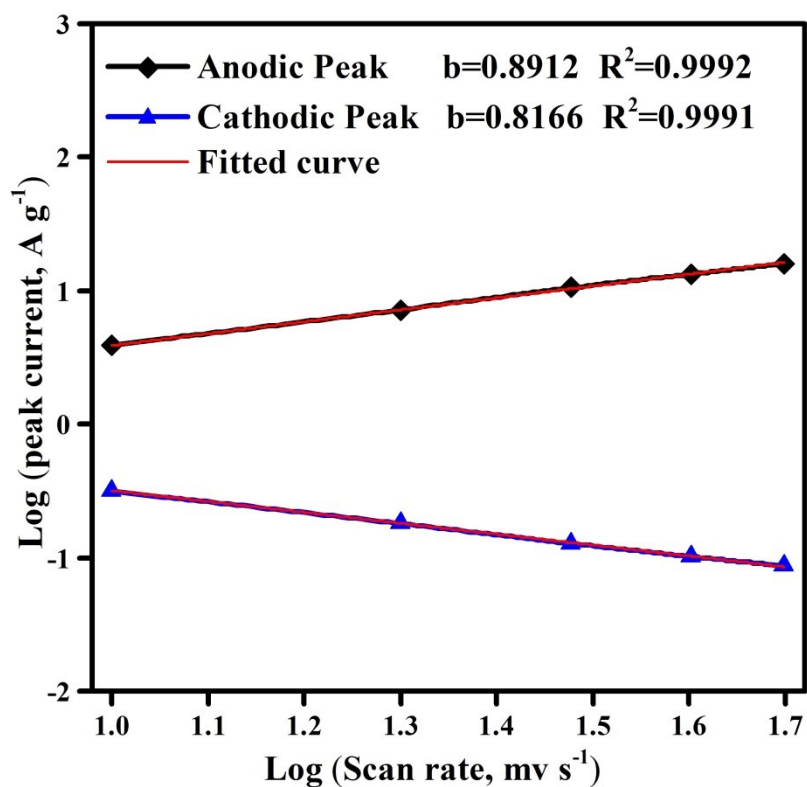

Figure S3. Dependence of anodic and cathodic peak current on the scan rates

**Table S1.** Specific capacity of different samples from CV and GCD at scan rate of 50 mV/s and current density of 1 A/g.

| Samples                  | C <sub>sp</sub> from GCD (C/g) | C <sub>sp</sub> from GCD (C/g) |
|--------------------------|--------------------------------|--------------------------------|
| PNTs                     | 437                            | 255                            |
| PNTs/MoS <sub>2</sub>    | 646                            | 520                            |
| CS-PNTs/MoS <sub>2</sub> | 856                            | 759                            |

**Table S2.** Specific capacity of CS-PNTs/MoS<sub>2</sub> //CS-PNTs/MoS<sub>2</sub> SSC device for different current density.

| CV               |                       | GCD                   |                       |
|------------------|-----------------------|-----------------------|-----------------------|
| Scan rate (mV/s) | C <sub>sp</sub> (C/g) | Current density (A/g) | C <sub>sp</sub> (C/g) |
| 10               | 442                   | 1                     | 437                   |
| 20               | 418                   | 2                     | 371                   |
| 30               | 393                   | 4                     | 183                   |
| 40               | 342                   | 5                     | 170                   |
| 50               | 307                   | 7                     | 142                   |
|                  |                       | 10                    | 102                   |

**Table S3.** Impedance parameter obtained from equivalent circuit for Nyquist plot of CS-PNTs/MoS<sub>2</sub> //CS-PNTs/MoS<sub>2</sub> SSC device.

| Parameters      | Values   |
|-----------------|----------|
| R <sub>s</sub>  | 0.9388   |
| C <sub>dl</sub> | 7.239E-5 |
| R <sub>ct</sub> | 1.18     |
| Z <sub>w</sub>  | 0.637    |
| C <sub>ps</sub> | 0.0048   |
